# Supplementary material for: Food Consumption and Nutrient Intake by Children Aged 10 to 48 Months Attending Day Care in The Netherlands
Source: Nutrients. 2016 Jul 14;8(7):428. doi: 10.3390/nu8070428 (PMC4963904; doi:10.3390/nu8070428)
Supplement: Supplementary file 1 [file nutrients-08-00428-s001.xls]

## Sheet: Suppl Table S1
Table S1. Mean daily nutrient intake by children 10–48 months old attending childcare by gender (mean of 2 days).
		Total Group 1			Boys			Girls
	Number	1526			759			683
Nutrient	Unit	Mean	SD		Mean	SD		Mean	SD
Energy	kJ	5383	958		5483	979		5271	915
Protein	g	44.9	9.4		45.6	9.4		44.2	9.3
	en%	14.1	2.2		14.1	2.1		14.2	2.3
Carbohydrates	g	174	34		177.6	34.9		170	32.6
	en%	54.4	5.1		54.5	5.1		54.3	5.1
Mono- and disaccharides	g	99.8	25.4		101.5	25.6		98.1	25.4
	en%	31.2	5.7		31.2	5.6		31.2	5.8
Polysaccharides	g	74.6	16.1		76.4	16.9		72.3	14.6
	en%	23.4	3.4		23.5	3.3		23.2	3.4
Fat	g	41.6	10.7		42.2	10.8		40.8	10.5
	en%	29.1	4.6		29	4.5		29.1	4.6
Saturated fatty acids	g	14.8	3.8		15	3.8		14.7	3.8
	en%	10.4	1.8		10.3	1.8		10.5	1.9
Monounsaturated fatty acids	g	14.4	4.5		14.6	4.7		14	4.4
	en%	10	2.3		10	2.3		10	2.3
Polyunsaturated fatty acids (PUFA)	g	8.6	3.2		8.8	3.2		8.4	3.2
	en%	6	1.8		6	1.8		6	1.8
n-3 PUFA	g	1	0.4		1.1	0.4		1	0.4
	en%	0.7	0.2		0.7	0.2		0.7	0.2
ALA (C18:3 (n-3) cis)	g	0.97	0.34		0.98	0.34		0.95	0.33
	en%	0.7	0.2		0.7	0.2		0.7	0.2
EPA (C20:5 (n-3) cis)	g	0.01	0.03		0.01	0.02		0.02	0.03
	en%	0	0		0	0		0	0
DHA (C22:6 (n-3) cis)	g	0.02	0.04		0.02	0.04		0.02	0.05
	en%	0	0		0	0		0	0
n-6 PUFA	g	7.3	2.8		7.5	2.8		7.1	2.8
	en%	5.1	1.6		5.1	1.5		5.1	1.6
Linoleic acid (C18:2 (n-6) cis)	g	7.3	2.8		7.4	2.8		7.1	2.8
	en%	5	1.6		5.1	1.5		5	1.6
Trans-unsaturated fatty acids	g	0.4	0.2		0.5	0.2		0.4	0.2
	en%	0.3	0.1		0.3	0.1		0.3	0.1
Cholesterol	mg	76.1	38		76.4	37.8		76.1	38.9
Dietary fibre	g	12.6	2.7		12.9	2.7		12.3	2.6
	g/MJ	2.4	0.4		2.4	0.4		2.4	0.4
Water	g	1045	248		1062	251		1036	243
Sodium	mg	1273	359		1286	367		1257	348
Potassium	mg	1923	405		1968	400		1879	411
Phospohorus	mg	943	199		954	199		935	201
Magnesium	mg	181	38		184	38		178	38
Iron	mg	6.3	2		6.4	2		6.1	2
Calcium	mg	735	186		739	185		730	190
Copper	mg	0.61	0.15		0.63	0.15		0.59	0.14
Selenium	µg	22	6		23	6		22	6
Zinc	mg	6	1.4		6.1	1.4		5.9	1.4
Iodine	µg	120.2	30.1		122	31.5		118.5	29.2
Vitamin A (RAE)	µg	846	568		850	575		837	563
Thiamin (Vitamin B1)	mg	0.58	0.17		0.59	0.17		0.56	0.18
Riboflavin (Vitamin B2)	mg	1.13	0.29		1.14	0.28		1.12	0.31
Niacin	mg	7.7	2.5		7.9	2.6		7.5	2.5
Vitamin B6	mg	0.8	0.267		0.819	0.265		0.784	0.273
Folate (DFE)	µg	156.2	47		158.9	48.3		154.1	46.6
Vitamin B12	µg	2.95	1.06		2.97	1.07		2.94	1.04
Vitamin C	mg	93	35		94	34		93	36
Vitamin D	µg	3.7	2.8		3.7	2.8		3.6	2.8
Vitamin E	mg	6.8	2.8		6.9	2.7		6.7	2.8
1 The total number of children does not equal the sum of those in both subgroups, due to missing data on gender.
RAE: Retinol Activity Equivalents; DFE: Dietary Folate Equivalents.

## Sheet: Suppl figure S1
	Figure S1. Consumption of foods by 1–3 years old by location.
Food group	Home	Child care centre
Fruit	21	103
Vegetables	47	11
Potatoes, rice, pasta, legumes	19	4
Potatoes, rice, pasta, legumes (exception)	27	2
Bread and breakfast cereals	32	66
Cheese (exception)	4	10
Milk products including soy milk and formula	200	132
Milk products incl. soy milk (exception)	74	16
Meat, poultry, fish, egg, substitutes	14	4
Meat, poultry, fish, egg, substitutes (exception)	24	11
Fats, oils	8	10
Beverages, excluding milk products	88	76
Beverages, excluding milk products (exception)	68	199
Mixed dishes	10	2
Mixed dishes (exception)	6	1
Sugar, sweet spreads	6	12
Cakes and biscuits	3	11
Confectionary	3	1
Sauces	5	1
Savoury spreads	1	2
Soups	8	1

## Sheet: Suppl Table S2 
Table S2. Distribution of usual nutrient intake as calculated with SPADE model1 for daily intakes and comparison of the distribution with dietary reference values.
				Distribution (in Percentiles) of Usual Intake							Median Compared to AI 3
Nutrient	Unit	Age (Months)	Mean	p5	p25	Median (p50)	p75	p95	AI 2	% < AI		TUIL 4	% > TUIL
Energy (Boys)	kJ	Total	5600.06	4297.01	5037.75	5581.43	6140.18	6966.52	.	23.5126	.	.	.
		10-11	4767.83	3735.51	4316.16	4745	5194.38	5878.59	5000	65.043	0	.	.
		12-23	5194.71	4079.72	4707.59	5170.62	5655.77	6390.48	5000	40.3238	2	.	.
		23-35	5678.08	4534.73	5180.19	5654.81	6150.56	6901.03	5000	17.3958	1	.	.
		35-48	6012.46	4839.02	5502.57	5989.24	6497.08	7265.19	5000	8.01849	1	.	.
Energy (Girls)	kJ	Total	5397.9	4138.76	4858.17	5382.26	5920.91	6709.7	.	18.8699	.	.	.
		10-11	4793.48	3717.99	4335.77	4780.42	5236.92	5913.53	4700	45.2017	1	.	.
		12-23	5016.83	3912.63	4547.13	5003.69	5472.21	6166.64	4700	32.7556	1	.	.
		23-35	5405.66	4276.77	4926.43	5392.95	5871.04	6578.62	4700	15.6641	1	.	.
		35-48	5819.12	4662.79	5329.07	5806.95	6295.69	7017.09	4700	5.59449	1	.	.
Protein	en%	Total	14.0654	11.3673	12.8412	13.9669	15.1828	17.1007	.	0.0025025	.	.	1.4438
		10-11	13.9635	11.3033	12.759	13.8678	15.0633	16.9487	6	0.0025025	1	15	26.113
		12-23	14.4675	11.7337	13.2307	14.3706	15.5986	17.5314	5	0.0025025	1	20	0.297676
		23-35	14.0454	11.3846	12.8407	13.9502	15.1469	17.0317	5	0.0025025	1	20	0.13833
		35-48	13.7393	11.1332	12.56	13.6464	14.8174	16.6638	5	0.0025025	1	20	0.0744232
Fat	en%	Total	28.9444	23.7114	26.7496	28.9069	31.0981	34.3082	.	15.2574	.	.	0.045225
		10-11	28.7303	23.5075	26.5406	28.6928	30.879	34.081	40	99.9609	0	40	0.0391455
		12-23	28.8105	23.5846	26.6196	28.7731	30.9605	34.1643	25	11.7177	1	40	0.0391455
		23-35	28.9482	23.7168	26.7552	28.9109	31.1004	34.307	25	10.8983	1	40	0.0448364
		35-48	29.0917	23.8547	26.8966	29.0545	31.2463	34.4559	25	10.0887	1	40	0.0519004
Carbohydrates	en%	Total	54.6081	48.475	52.0945	54.6075	57.1225	60.7416	.	1.10448	.	.	.
		10-11	54.1856	48.0697	51.6773	54.1853	56.6935	60.3024	50	13.0173	1	.	.
		12-23	54.3441	48.2281	51.8358	54.3438	56.852	60.4609	45	0.600107	1	.	.
		23-35	54.6158	48.4998	52.1075	54.6155	57.1237	60.7327	45	0.486289	1	.	.
		35-48	54.8987	48.7827	52.3904	54.8985	57.4068	61.0158	45	0.38812	1	.	.
Saturated fatty acids	en%	Total	10.3526	8.18984	9.39814	10.2978	11.247	12.7014	.	.	.	.	0.114404
		10-11	10.7699	8.55253	9.79303	10.7151	11.6865	13.1738	.	.	.	15	0.297676
		12-23	10.1816	8.05211	9.2419	10.1279	11.0618	12.494	.	.	.	15	0.0692261
		23-35	10.316	8.16998	9.37017	10.2622	11.2031	12.6456	.	.	.	15	0.0976807
		35-48	10.4783	8.3142	9.52452	10.4244	11.3733	12.8262	.	.	.	15	0.143449
Polyunsaturated	en%	Total	5.90044	4.00124	4.99903	5.79724	6.6893	8.15206	.	.	.	.	0.00987793
fatty acids		10-11	5.91065	4.00879	5.00799	5.80727	6.70048	8.16507	.	.	.	12	0.00987793
		12-23	5.90682	4.00593	5.0046	5.80348	6.69625	8.16014	.	.	.	12	0.00987793
		23-35	5.90026	4.00103	4.99879	5.79697	6.68899	8.15171	.	.	.	12	0.00987793
		35-48	5.89343	3.99593	4.99275	5.7902	6.68144	8.14292	.	.	.	12	0.00987793
Linoleic acid	en%	Total	5.03148	3.40329	4.25598	4.94069	5.70793	6.97067	.	0.00987793	.	.	.
		10-11	4.96426	3.35391	4.19723	4.87419	5.63295	6.88174	2	0.00987793	1	.	.
		12-23	4.98935	3.3725	4.21935	4.89903	5.66074	6.9142	2	0.00987793	1	.	.
		23-35	5.03258	3.40454	4.25747	4.94183	5.70861	6.97009	2	0.00987793	1	.	.
		35-48	5.07791	3.43817	4.29746	4.98672	5.75881	7.02868	2	0.00987793	1	.	.
n-3 fish fatty acids	g	Total	0.0268999	0.00352325	0.00919913	0.0175037	0.0330234	0.0803401	0.15	98.9591	0	.	.
(EPA + DHA) 5		10-11	0.0306094	0.0038202	0.010172	0.0197631	0.0378204	0.090923	0.15	98.5107	0	.	.
		12-23	0.030216	0.00392703	0.0103126	0.0197063	0.03705	0.0902281	0.15	98.5455	0	.	.
		23-35	0.0269463	0.00359982	0.00936062	0.0177227	0.0332335	0.0795913	0.15	99.0044	0	.	.
		35-48	0.0233537	0.00317047	0.00813278	0.0153426	0.0286063	0.0696109	0.15	99.3524	0	.	.
n-3 fish fatty acids	g	Total	0.0271126	0.00368009	0.0095087	0.0178817	0.0332913	0.0808044	0.2	99.6052	0	.	.
(EPA + DHA) 5		10-11	0.0302773	0.0038464	0.0107639	0.0200737	0.0372743	0.0921028	0.2	99.5105	0	.	.
		12-23	0.0305704	0.00415175	0.0107922	0.0202423	0.0374285	0.0913494	0.2	99.406	0	.	.
		23-35	0.0272745	0.00380764	0.00970763	0.0180807	0.0334819	0.0806963	0.2	99.6004	0	.	.
		35-48	0.0234131	0.00326735	0.00835073	0.0156132	0.0289137	0.0688785	0.2	99.8013	0	.	.
Alphalinolenic acid	en%	Total	0.673986	0.464262	0.574798	0.662882	0.761077	0.921546	.	98.0817	.	.	.
		10-11	0.683826	0.471834	0.583593	0.672624	0.771831	0.934016	1	97.7365	0	.	.
		12-23	0.680117	0.469042	0.5803	0.668948	0.767742	0.929275	1	97.8731	0	.	.
		23-35	0.673791	0.464283	0.574686	0.66268	0.760768	0.921188	1	98.0967	0	.	.
		35-48	0.667253	0.459366	0.568884	0.6562	0.753555	0.912823	1	98.3046	0	.	.
Dietary fibre	g/MJ	Total	2.32521	1.82471	2.09465	2.30392	2.53249	2.8983	.	91.8579	.	.	.
		12-23	2.44571	1.93336	2.21177	2.42568	2.65785	3.02638	2.8	85.587	0	.	.
		23-35	2.30582	1.82584	2.08687	2.28731	2.50448	2.84868	2.8	93.4908	0	.	.
		35-48	2.23534	1.76922	2.02271	2.21739	2.42825	2.76301	2.8	95.9622	0	.	.
Calcium	mg	Total	731.491	493.002	627.046	726.307	830.25	987.553	.	5.40797	.	.	0.0025025
		10-11	729.392	491.167	625.057	724.22	828.069	985.244	450	2.49762	1	1500	0.0025025
		12-23	730.179	491.861	625.809	725.009	828.894	986.117	500	5.66467	1	2500	0.0025025
		23-35	731.529	493.051	627.099	726.363	830.308	987.615	500	5.56305	1	2500	0.0025025
		35-48	732.936	494.292	628.443	727.774	831.783	989.175	500	5.45997	1	2500	0.0025025
Iron	mg	Total	6.17621	3.72501	4.97088	6.00403	7.19189	9.21404	.	86.1066	.	.	.
		10-11	7.61814	4.74341	6.2262	7.43868	8.81421	11.1058	8	61.228	0	.	.
		12-23	6.15086	3.72152	4.96256	5.98845	7.16198	9.13366	8	86.6083	0	.	.
		23-35	6.01512	3.64961	4.86107	5.85956	6.99942	8.91111	8	88.5561	0	.	.
		35-48	6.13683	3.73494	4.96613	5.97987	7.13627	9.07414	8	87.0316	0	.	.
Potassium	mg	Total	1942.51	1420.5	1717.63	1933.97	2158.05	2493.32	.	20.8902	.	.	.
		10-11	1737.75	1246.74	1524.33	1728.42	1940.85	2260.89	1100	1.43423	1	.	.
		12-23	1896.01	1385.21	1674.89	1886.96	2107.09	2437.77	1400	5.54539	1	.	.
		23-35	1970.07	1457.51	1748.52	1961.14	2181.87	2513.08	1800	30.5547	1	.	.
		35-48	1988.57	1474.27	1766.34	1979.67	2201.08	2533.23	1800	28.5602	1	.	.
Sodium	mg	Total	1312.76	879.774	1120.67	1301.04	1491.44	1784.87	.	.	.	.	68.7277
		10-11	990.163	675.043	844.584	976.677	1121.02	1351.2	.	.	.	400	99.9852
		12-23	1197.29	824.774	1026.41	1182.54	1352.1	1619.97	.	.	.	1200	47.1266
		23-35	1355.02	968.42	1178.8	1340.47	1515.5	1791.25	.	.	.	1200	71.9974
		35-48	1424.12	1026.3	1243.14	1409.59	1589.07	1871.62	.	.	.	1200	80.4766
Phophorus	mg	Total	953.987	696.913	841.117	948.016	1060.32	1231.36	.	0.0283116	.	.	0.0025025
		10-11	853.684	617.157	749.064	847.543	951.622	1111.29	420	0.0489014	1	4000	0.0025025
		12-23	919.743	672.195	810.476	913.555	1022.25	1188.32	470	0.0578442	1	4000	0.0025025
		23-35	967.173	715.822	856.553	961.098	1071.16	1239.25	470	0.0163818	1	4000	0.0025025
		35-48	987.088	733.607	875.557	981.026	1092.01	1261.26	470	0.00987793	1	4000	0.0025025
Magnesium	mg	Total	184.129	134.001	161.327	182.301	204.923	240.553	.	0.434639	.	.	.
		10-11	162.522	118.544	142.406	160.808	180.772	212.361	80	0.0196338	1	.	.
		12-23	175.181	128.286	153.76	173.385	194.636	228.215	85	0.0135266	1	.	.
		23-35	186.674	138.114	164.558	184.856	206.823	241.408	120	0.85376	1	.	.
		35-48	192.933	143.268	170.361	191.109	213.518	248.844	120	0.486454	1	.	.
Copper	mg	Total	0.621063	0.435204	0.535983	0.613824	0.698209	0.831447	.	0.96542	.	.	0.302136
		10-11	0.575298	0.402845	0.496374	0.568579	0.646892	0.770631	0.3	0.190361	1	1	0.0635352
		12-23	0.592104	0.415929	0.51152	0.585289	0.665194	0.791305	0.3	0.124509	1	1	0.109875
		23-35	0.621548	0.439791	0.53858	0.614658	0.696939	0.826581	0.4	1.90251	1	1	0.252148
		35-48	0.653163	0.46548	0.567717	0.646196	0.731064	0.86439	0.4	0.969076	1	1	0.554616
Selenium	µg	Total	22.5178	16.6328	19.7288	22.1967	24.9551	29.4992	.	57.0083	.	.	0.0025025
		10-11	21.3168	15.8214	18.7181	21.0212	23.592	27.8196	15	2.55616	1	60	0.0025025
		12-23	21.7568	16.1449	19.1025	21.4544	24.0798	28.4007	20	34.1531	1	60	0.0025025
		23-35	22.5294	16.7274	19.7858	22.2173	24.9312	29.3965	25	75.5061	0	60	0.0025025
		35-48	23.362	17.3547	20.522	23.0396	25.8489	30.4706	25	68.3734	0	60	0.0025025
Zinc	mg	Total	5.99544	4.37769	5.24026	5.91814	6.66624	7.87685	.	40.6151	.	.	16.965
		10-11	5.99762	4.37937	5.2422	5.92029	6.6686	7.87956	5	17.5464	1	7	17.0163
		12-23	5.9968	4.37874	5.24147	5.91948	6.66771	7.87853	5	17.5656	1	7	16.9971
		23-35	5.9954	4.37765	5.2402	5.91809	6.66617	7.87677	6	53.0748	0	7	16.9641
		35-48	5.99394	4.37651	5.23889	5.91663	6.66457	7.87494	6	53.1292	0	7	16.9297
Iodine	µg	Total	120.869	85.9675	104.595	119.227	135.354	161.383	.	4.515	.	.	0.194713
		10-11	116.411	82.728	100.698	114.821	130.389	155.515	50	0.0025025	1	200	0.0976807
		12-23	118.062	83.9774	102.174	116.46	132.204	157.626	70	0.609863	1	200	0.122883
		23-35	120.929	86.2041	104.755	119.308	135.337	161.201	90	7.5676	1	200	0.186296
		35-48	123.971	88.5681	107.494	122.33	138.66	164.996	90	5.85829	1	200	0.280765
Vitamin A	µg	Total	820.988	357.371	550.478	743.465	1004.14	1546.77	.	3.54715	.
(RAE)		10-11	778.93	339.771	522.941	705.7	952.33	1465.73	300	2.71225	1
		12-23	794.336	346.491	533.284	719.657	971.165	1494.72	300	2.44966	1
		23-35	821.393	358.293	551.449	744.171	1004.25	1545.63	350	4.48375	1
		35-48	850.56	371.018	570.886	770.601	1039.91	1600.53	350	3.78927	1
Retinol	µg	Total	701.053	261.18	432.018	612.888	869.499	1438.28				.	30.3671
		10-11	666.633	248.853	411.226	583.05	826.668	1366.06				800	27.0551
		12-23	679.253	253.564	419.011	594.089	842.319	1391.92				800	28.269
		23-35	701.397	261.831	432.671	613.456	869.779	1437.3				800	30.3995
		35-48	725.232	270.73	447.378	634.307	899.342	1486.15				800	32.6946
Thiamin (Vitamin B1)	mg	Total	0.574036	0.375007	0.474039	0.557826	0.656157	0.828245	.	0.494084	.	.	.
		10-11	0.584554	0.382068	0.482874	0.568043	0.66806	0.843234	0.2	0.0025025	1	.	.
		12-23	0.580577	0.379458	0.479582	0.564177	0.66352	0.837517	0.3	0.444827	1	.	.
		23-35	0.573817	0.37502	0.473986	0.557604	0.655802	0.827798	0.3	0.512305	1	.	.
		35-48	0.566861	0.370452	0.468226	0.550839	0.647858	0.817793	0.3	0.592961	1	.	.
Riboflavin (Vitamin B2)	mg	Total	1.13429	0.75246	0.96225	1.12188	1.29288	1.55834	.	0.123276	.	.	.
		10-11	1.08229	0.712327	0.915248	1.07007	1.236	1.49392	0.4	0.0293896	1	.	.
		12-23	1.1016	0.727963	0.93302	1.0894	1.25678	1.51701	0.5	0.1928	1	.	.
		23-35	1.13505	0.755786	0.964206	1.12288	1.29253	1.55597	0.5	0.12207	1	.	.
		35-48	1.17038	0.785251	0.997301	1.15826	1.33027	1.59708	0.5	0.0759247	1	.	.
Niacin	mg NE	Total	7.81692	5.02708	6.48333	7.65828	8.97728	11.1484	.	0.628701	.	.	0.0025025
		10-11	7.27627	4.66889	6.02901	7.12699	8.36071	10.3928	2	0.0025025	1	35	0.0025025
		12-23	7.47443	4.81075	6.20129	7.32283	8.58209	10.6559	4	1.05294	1	35	0.0025025
		23-35	7.82228	5.06677	6.50783	7.6677	8.968	11.1057	4	0.622058	1	35	0.0025025
		35-48	8.19682	5.34338	6.83836	8.03913	9.3832	11.5892	4	0.346869	1	35	0.0025025
Vitamin B6	mg	Total	0.806997	0.507791	0.654159	0.78	0.930052	1.19791	.	0.48966	.	.	0.0025025
		10-11	0.787748	0.496159	0.638811	0.761481	0.907708	1.16869	0.2	0.0025025	1	3	0.0025025
		12-23	0.794889	0.500657	0.644602	0.768385	0.915938	1.17928	0.4	0.609863	1	5	0.0025025
		23-35	0.80727	0.508455	0.654642	0.780353	0.930204	1.19765	0.4	0.514744	1	5	0.0025025
		35-48	0.82037	0.516708	0.665268	0.793019	0.945302	1.21709	0.4	0.430147	1	5	0.0025025
Folate (DFE)	µg	Total	155.445	101.595	128.303	150.962	177.629	224.575	.	0.841503	.
		10-11	171.227	112.198	141.571	166.384	195.564	246.692	60	0.0025025	1
		12-23	158.809	103.977	131.226	154.302	181.412	229.043	85	0.650513	1
		23-35	153.363	100.569	126.837	149.04	175.128	220.872	85	0.945627	1
		35-48	152.053	99.7096	125.754	147.766	173.632	218.985	85	1.03874	1
Folic acid 5	µg	Total	13.0646	1.20672e-21	8.7807e-07	0.392834	19.1664	57.7687	.	.	.	.
		10-11	33.8964	3.37732e-05	8.4535	26.0822	47.78	97.6544	.	.	.	130	2.03083
		12-23	19.2493	1.32923e-10	0.0162751	10.3113	28.9009	69.6743	.	.	.	200	0.106925
		23-35	10.3339	3.70081e-20	3.28023e-07	0.0897182	14.4118	48.4523	.	.	.	200	0.0280695
		35-48	7.01225	8.18775e-30	5.98171e-12	0.000288606	5.50151	39.0715	.	.	.	200	0.0106165
Vitamin B12	µg	Total	2.99075	1.79245	2.41439	2.92033	3.4901	4.42813	.	0.0026882	.	.	.
		10-11	2.67662	1.59586	2.15608	2.61231	3.12698	3.97615	0.5	0.0025025	1	.	.
		12-23	2.79067	1.67526	2.25433	2.72523	3.25531	4.12819	0.7	0.00311712	1	.	.
		23-35	2.99283	1.82222	2.43247	2.92603	3.48032	4.39012	0.7	0.0025025	1	.	.
		35-48	3.21338	1.98373	2.62668	3.14518	3.72535	4.67459	0.7	0.0025025	1	.	.
Vitamin C	mg	Total	92.4962	48.6477	71.5052	90.0824	110.855	144.589	.	0.339313	.	.	.
		10-11	94.939	50.4699	73.7093	92.5327	113.546	147.616	20	0.0342676	1	.	.
		12-23	94.0172	49.796	72.8891	91.6109	112.522	146.447	25	0.131826	1	.	.
		23-35	92.4469	48.6507	71.4931	90.0406	110.778	144.451	30	0.420437	1	.	.
		35-48	90.8264	47.4726	70.0537	88.4197	108.975	142.388	30	0.494652	1	.	.
Vitamin D	µg	Total	3.40375	0.921045	1.80834	2.82171	4.33204	7.85088	.	97.9856	.	.	.
		10-11	6.13096	1.94894	3.57342	5.31839	7.77728	13.0672	10	87.2272	0	.	.
		12-23	3.86697	1.10831	2.13487	3.27709	4.93491	8.61798	10	97.2162	0	.	.
		23-35	3.0685	0.87702	1.69395	2.60283	3.91851	6.83756	10	99.0471	0	.	.
		35-48	2.90055	0.821709	1.59385	2.45567	3.70606	6.48503	10	99.2652	0	.	.
Vitamin E	mg	Total	6.85146	3.77558	5.28955	6.59141	8.12969	10.8139	.	14.8135	.	.	.
		10-11	7.81388	4.39139	6.08661	7.53578	9.23738	12.1883	3	0.356211	1	100	0.0025025
		12-23	6.4982	3.57579	5.01442	6.25159	7.71257	10.262	4	9.14963	1	100	0.0025025
		23-35	6.76408	3.74932	5.23683	6.51326	8.01698	10.6353	5	20.8029	1	100	0.0025025
		35-48	7.10724	3.97091	5.52315	6.85037	8.40968	11.122	5	16.4794	1	100	0.0025025
1 Dekkers ALM, Verkaik-Kloosterman J, Rossum CTM, Ocke MC: SPADE, a new statistical program to estimate habitual dietary intake from multiple food sources and dietary supplements. J Nutrition 2014, 144(12):2083.
2 AI: Adequate Intake or Population reference intake.
3 0 = median usual intake below adequate intake; 1 = median usual intake above adequate intake; 2 = median usual intake below or above adequate
intake depending on age group. If median intake is below adequate intake, intake is possibly inadequate
4 TUIL: Tolerable Upper Intake level.
5 Usual intake distribution calculated with SPADE model for episodal intakes.
